# Supplementary material for: Investigator-initiated versus industry-sponsored trials – visibility and relevance of randomized controlled trials in clinical practice guidelines (IMPACT)
Source: Springer Nature journal article supplement (doi:10.1186/s12874-025-02535-z), 2025-03-26
Supplement: MOESM1 [file 12874_2025_2535_MOESM1_ESM.pdf]

## Additional file 1

(Hecht et al. *Investigator-initiated versus industry-sponsored trials – Visibility and relevance of randomized controlled trials in clinical practice guidelines (IMPACT)*)

### Illustration of the process of identifying forward citations of RCTs

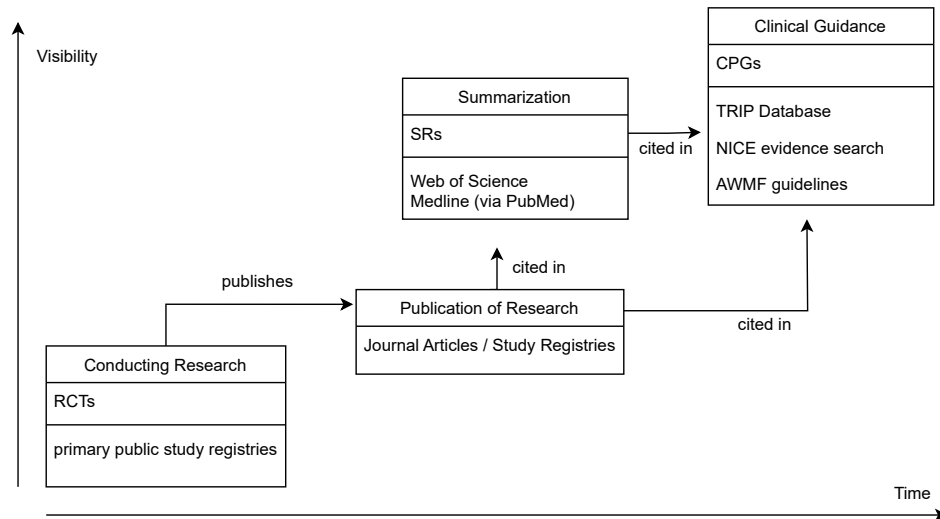

**Fig. 1:** Process of identifying forward citations of RCTs. This illustration is adapted from Nury et al. [1].

## References

- [1] Nury E, Bischoff K, Wollmann K, Nitschke K, Lohner S, Schumacher M, et al. Impact of investigator initiated trials and industry sponsored trials on medical practice (IMPACT): rationale and study design. *BMC Medical Research Methodology*. 2020 Dec;20(1):246. <https://doi.org/10.1186/s12874-020-01125-5>.
